# Supplementary material for: A dentate gyrus-CA3 inhibitory circuit promotes evolution of hippocampal-cortical ensembles during memory consolidation
Source: eLife. 2022 Feb 22;11:e70586. doi: 10.7554/eLife.70586 (PMC8903830; doi:10.7554/eLife.70586)
Supplement: Supplementary file 1. [file elife-70586-supp1.xlsx]

## Sheet: Figure1
Figure 1 B	CA3
PV puncta quantification	Mann Whitney test
	P value	0.0286
	Exact or approximate P value?	Exact
	P value summary	*
	Significantly different (P < 0.05)?	Yes
	One- or two-tailed P value?	Two-tailed
	Sum of ranks in column A,B	10 , 26
	Mann-Whitney U	0
	CA1
	test for normality (because only 4 mice)
	Shapiro-Wilk test	shNT superficial	shRNA superficial	shNT deep	shRNA deep
	W	0.9088	0.9628	0.9425	0.966
	P value	0.476	0.7962	0.6697	0.8164
	Passed normality test (alpha=0.05)?	Yes	Yes	Yes	Yes
	P value summary	ns	ns	ns	ns
	followed by:
	Two way ANOVA with repeated measures
	Source of Variation	% of total variation	P value	P value summary	Significant?	F (DFn, DFd)
	layer x virus	0.2593	0.5828	ns	No	F (1, 6) = 0.3369
	layer	80.54	<0.0001	****	Yes	F (1, 6) = 104.6
	virus	0.2593	0.7529	ns	No	F (1, 6) = 0.1086
	Subject	14.33	0.0971	ns	No	F (6, 6) = 3.102
	ACC
	Mann Whitney test
	P value	0.8857
	Exact or approximate P value?	Exact
	P value summary	ns
	Significantly different (P < 0.05)?	No
	One- or two-tailed P value?	Two-tailed
	Sum of ranks in column A,B	17 , 19
	Mann-Whitney U	7

## Sheet: Figure2
Figure 2c	Two way ANOVA with repeated measures
freezing	ACC
	Source of Variation	% of total variation	P value	P value summary	Significant?	Geisser-Greenhouse's epsilon	F (DFn, DFd)
	time x virus	2.476	0.7018	ns	No		F (5, 40) = 0.5977
	time	47.54	0.0033	**	Yes	0.285	F (1.425, 11.40) = 11.48
	virus	0.1486	0.7963	ns	No		F (1, 8) = 0.07122
	Subject	16.69	0.0255	*	Yes		F (8, 40) = 2.518
	CA1
	Source of Variation	% of total variation	P value	P value summary	Significant?	Geisser-Greenhouse's epsilon	F (DFn, DFd)
	time x virus	1.417	0.838	ns	No		F (5, 45) = 0.4119
	time	52.59	0.0002	***	Yes	0.3665	F (5, 45) = 15.28
	virus	0.8479	0.4899	ns	No		F (1, 9) = 0.5183
	Subject	14.72	0.027	*	Yes		F (9, 45) = 2.377
Figure 2 e	Paired t test
SD activity
	ACC shNT
	P value	0.0039
	P value summary	**
	Significantly different (P < 0.05)?	Yes
	One- or two-tailed P value?	Two-tailed
	t, df	t=6.011, df=4
	Number of pairs	5
	ACC shRNA
	P value	0.0125
	P value summary	*
	Significantly different (P < 0.05)?	Yes
	One- or two-tailed P value?	Two-tailed
	t, df	t=4.315, df=4
	Number of pairs	5
	CA1 shNT
	P value	0.0069
	P value summary	**
	Significantly different (P < 0.05)?	Yes
	One- or two-tailed P value?	Two-tailed
	t, df	t=5.109, df=4
	Number of pairs	5
	CA1 shRNA
	P value	0.0241
	P value summary	*
	Significantly different (P < 0.05)?	Yes
	One- or two-tailed P value?	Two-tailed
	t, df	t=3.538, df=4
	Number of pairs	5
Figure 2 g	Paired t test
	ACC shNT
	P value	0.0207
	P value summary	*
	Significantly different (P < 0.05)?	Yes
	One- or two-tailed P value?	Two-tailed
	t, df	t=3.708, df=4
	Number of pairs	5
	ACC shRNA
	P value	0.1411
	P value summary	ns
	Significantly different (P < 0.05)?	No
	One- or two-tailed P value?	Two-tailed
	t, df	t=1.831, df=4
	Number of pairs	5
	CA1 shNT
	P value	0.0205
	P value summary	*
	Significantly different (P < 0.05)?	Yes
	One- or two-tailed P value?	Two-tailed
	t, df	t=3.719, df=4
	Number of pairs	5
	CA1 shRNA
	P value	0.0012
	P value summary	**
	Significantly different (P < 0.05)?	Yes
	One- or two-tailed P value?	Two-tailed
	t, df	t=8.143, df=4
	Number of pairs	5

## Sheet: Figure 3
Figure 3 b	Two way ANOVA with repeated measures
upper panel	discrimination idx (ACC &CA1 mice)
	Source of Variation	% of total variation	P value	P value summary	Significant?	Geisser-Greenhouse's epsilon	F (DFn, DFd)
	time x virus	3.168	0.4337	ns	No		F (5, 90) = 0.9813
	time	11.32	0.0146	*	Yes	0.7197	F (3.598, 64.77) = 3.505
	virus	2.147	0.232	ns	No		F (1, 18) = 1.530
	Subject	25.25	0.0088	**	Yes		F (18, 90) = 2.173
	freezing in A (ACC &CA1 mice)
lower left	Source of Variation	% of total variation	P value	P value summary	Significant?	Geisser-Greenhouse's epsilon	F (DFn, DFd)
	time x virus	0.1691	0.9966	ns	No		F (5, 95) = 0.06927
	time	12.04	0.0013	**	Yes	0.8149	F (4.074, 77.41) = 4.932
	virus	5.595	0.1009	ns	No		F (1, 19) = 2.973
	Subject	35.75	<0.0001	****	Yes		F (19, 95) = 3.853
lower right	freezing in C (ACC &CA1 mice)
	Source of Variation	% of total variation	P value	P value summary	Significant?	Geisser-Greenhouse's epsilon	F (DFn, DFd)
	time x virus	1.42	0.7574	ns	No		F (5, 90) = 0.5241
	time	23.11	<0.0001	****	Yes	0.612	F (3.060, 55.08) = 8.533
	virus	0.4394	0.59	ns	No		F (1, 18) = 0.3010
	Subject	26.28	0.0011	**	Yes		F (18, 90) = 2.695
Figure 3d	One sample t test against 1 (baseline)
cross correlated pairs
normalized to CC pairs in BL	ACC	ctx A shNT	ctx A shRNA	ctx C shNT	ctx C shRNA
	t, df	t=1.587, df=4	t=3.891, df=4	t=1.014, df=4	t=2.419, df=4
	P value (two tailed)	0.1876	0.0177	0.3678	0.0729
	P value summary	ns	*	ns	ns
	Significant (alpha=0.05)?	No	Yes	No	No
	CA1	ctx A shNT	ctx A shRNA	ctx C shNT	ctx C shRNA
	t, df	t=6.419, df=4	t=2.486, df=5	t=2.233, df=4	t=0.6008, df=5
	P value (two tailed)	0.003	0.0554	0.0893	0.5742
	P value summary	**	ns	ns	ns
	Significant (alpha=0.05)?	Yes	No	No	No
ACC	Unpaired student's t-test with Welch's correction
context A	P value	0.1204
	P value summary	ns
	Significantly different (P < 0.05)?	No
	One- or two-tailed P value?	Two-tailed
	Welch-corrected t, df	t=1.739, df=7.974
ACC context C	Unpaired student's t-test with Welch's correction
	P value	0.4031
	P value summary	ns
	Significantly different (P < 0.05)?	No
	One- or two-tailed P value?	Two-tailed
	Welch-corrected t, df	t=0.8832, df=7.936
CA1	Unpaired student's t-test with Welch's correction
context A	P value	0.8892
	P value summary	ns
	Significantly different (P < 0.05)?	No
	One- or two-tailed P value?	Two-tailed
	Welch-corrected t, df	t=0.1451, df=6.270
CA1	Unpaired t test with Welch's correction
context C	P value	0.1471
	P value summary	ns
	Significantly different (P < 0.05)?	No
	One- or two-tailed P value?	Two-tailed
	Welch-corrected t, df	t=1.613, df=7.668
Figure 3 f	One sample t test against 0
Sd activtity A&C neurons
	ACC	shNT	shRNA
	t, df	t=0.9813, df=3	t=0.4901, df=4
	P value (two tailed)	0.3988	0.6497
	P value summary	ns	ns
	Significant (alpha=0.05)?	No	No
	CA1	shNT	shRNA
	t, df	t=5.057, df=4	t=2.824, df=4
	P value (two tailed)	0.0072	0.0476
	P value summary	**	*
	Significant (alpha=0.05)?	Yes	Yes
Figure 3 h	Unpaired t test with Welch's correction
normalized jaccard idx	ACC
upper panel	P value	0.2836
	P value summary	ns
	Significantly different (P < 0.05)?	No
	One- or two-tailed P value?	Two-tailed
	Welch-corrected t, df	t=1.149, df=7.999
lower panel	CA1
	P value	0.048
	P value summary	*
	Significantly different (P < 0.05)?	Yes
	One- or two-tailed P value?	Two-tailed
	Welch-corrected t, df	t=2.397, df=6.941
Figure 3 j	Two way ANOVA with repeated measures
discrimination idx	Source of Variation	% of total variation	P value	P value summary	Significant?	Geisser-Greenhouse's epsilon	F (DFn, DFd)
upper panel	time x virus	0.231	0.9931	ns	No		F (5, 90) = 0.09301
	time	2.452	0.4118	ns	No	0.6759	F (3.379, 60.83) = 0.9874
	virus	12.74	0.0276	*	Yes		F (1, 18) = 5.749
	Subject	39.88	<0.0001	****	Yes		F (18, 90) = 4.460
lower left	freezing in A
	Source of Variation	% of total variation	P value	P value summary	Significant?	Geisser-Greenhouse's epsilon	F (DFn, DFd)
	time x virus	1.212	0.7454	ns	No		F (5, 90) = 0.5401
	time	9.019	0.0041	**	Yes	0.8664	F (4.332, 77.98) = 4.020
	virus	3.94	0.2276	ns	No		F (1, 18) = 1.560
	Subject	45.45	<0.0001	****	Yes		F (18, 90) = 5.628
lower right	freezing in C
	Source of Variation	% of total variation	P value	P value summary	Significant?		F (DFn, DFd)
	time x virus	1.082	0.8239	ns	No		F (5, 95) = 0.4339
	time	6.365	0.0568	ns	No	0.6725	F (5, 95) = 2.553
	virus	0.9172	0.537	ns	No		F (1, 19) = 0.3953
	Subject	44.08	<0.0001	****	Yes		F (19, 95) = 4.653
Figure 3 K	One sample t test against 1 (baseline)
correlated pairs	ACC	ctx A shNT	ctx A shRNA	ctx C shNT	ctx C shRNA
	t, df	t=0.8494, df=4	t=1.233, df=4	t=0.5539, df=4	t=0.2664, df=4
	P value (two tailed)	0.4435	0.285	0.6092	0.8031
	P value summary	ns	ns	ns	ns
	Significant (alpha=0.05)?	No	No	No	No
	CA1	ctx A shNT	ctx A shRNA	ctx C shNT	ctx C shRNA
	t, df	t=5.223, df=4	t=3.012, df=4	t=0.03625, df=4	t=3.466, df=4
	P value (two tailed)	0.0064	0.0395	0.9728	0.0257
	P value summary	**	*	ns	*
	Significant (alpha=0.05)?	Yes	Yes	No	Yes
ACC	Unpaired t test with Welch's correction
context A	P value	0.572
	P value summary	ns
	Significantly different (P < 0.05)?	No
	One- or two-tailed P value?	Two-tailed
	Welch-corrected t, df	t=0.5940, df=6.722
ACC context C	Unpaired t test with Welch's correction
	P value	0.5743
	P value summary	ns
	Significantly different (P < 0.05)?	No
	One- or two-tailed P value?	Two-tailed
	Welch-corrected t, df	t=0.5856, df=7.974
CA1	Unpaired t test with Welch's correction
context A	P value	0.1613
	P value summary	ns
	Significantly different (P < 0.05)?	No
	One- or two-tailed P value?	Two-tailed
	Welch-corrected t, df	t=1.676, df=4.484
CA1	Unpaired t test with Welch's correction
context C	P value	0.0423
	P value summary	*
	Significantly different (P < 0.05)?	Yes
	One- or two-tailed P value?	Two-tailed
	Welch-corrected t, df	t=2.413, df=7.999
correlated pairs in A	CA1 day 1 vs day 16
(comparison not shown)	Two tailed paired t-test
data in Fig 1d & 1k	shNT
	P value	0.0408
	P value summary	*
	Significantly different (P < 0.05)?	Yes
	One- or two-tailed P value?	Two-tailed
	t, df	t=2.979, df=4
	Number of pairs	5
	shRNA
	P value	0.8386
	P value summary	ns
	Significantly different (P < 0.05)?	No
	One- or two-tailed P value?	Two-tailed
	t, df	t=0.2173, df=4
	Number of pairs	5
Figure 3 l
SD calcium activity A&C neurons	One sample t test against 0
	ACC	shNT	shRNA
	t, df	t=1.935, df=3	t=0.2936, df=4
	P value (two tailed)	0.1484	0.7837
	P value summary	ns	ns
	Significant (alpha=0.05)?	No	No
	CA1	shNT	shRNA
	t, df	t=0.2370, df=4	t=4.410, df=4
	P value (two tailed)	0.8243	0.0116
	P value summary	ns	*
	Significant (alpha=0.05)?	No	Yes
Figure 3 m	Unpaired t test with Welch's correction
normalized jaccard idx	ACC
	P value	0.0284
	P value summary	*
	Significantly different (P < 0.05)?	Yes
	One- or two-tailed P value?	Two-tailed
	Welch-corrected t, df	t=2.703, df=7.568
	CA1
	P value	0.3401
	P value summary	ns
	Significantly different (P < 0.05)?	No
	One- or two-tailed P value?	Two-tailed
	Welch-corrected t, df	t=1.039, df=5.823
normalized jaccard idx	Two way ANOVA with repeated measures
ACC shNT, shRNA over time	Source of Variation	% of total variation	P value	P value summary	Significant?	F (DFn, DFd)
day 1 & day 16	time x virus	29.59	0.0177	*	Yes	F (1, 8) = 8.860
(graph not shown)	time	4.288	0.29	ns	No	F (1, 8) = 1.284
data from Figure 3h & m	virus	7.803	0.1975	ns	No	F (1, 8) = 1.976
	Subject	31.6	0.4091	ns	No	F (8, 8) = 1.183
Figure 3 n	see suppl Figure 2f,h
A&C neurons among Ccpairs

## Sheet: Figure 4
Figure 4 b	One sample t test against 50
	day 1	shNT	shRNA
	t, df	t=5.468, df=3	t=7.471, df=3
	P value (two tailed)	0.012	0.005
	P value summary	*	**
	Significant (alpha=0.05)?	Yes	Yes
	day 16	shNT	shRNA
	t, df	t=9.390, df=3	t=6.290, df=3
	P value (two tailed)	0.0026	0.0081
	P value summary	**	**
	Significant (alpha=0.05)?	Yes	Yes
	Mann Whitney test
	day 1
	P value	0.4857
	Exact or approximate P value?	Exact
	P value summary	ns
	Significantly different (P < 0.05)?	No
	One- or two-tailed P value?	Two-tailed
	Sum of ranks in column A,B	15 , 21
	Mann-Whitney U	5
	day 16
	P value	0.0286
	Exact or approximate P value?	Exact
	P value summary	*
	Significantly different (P < 0.05)?	Yes
	One- or two-tailed P value?	Two-tailed
	Sum of ranks in column C,D	10 , 26
	Mann-Whitney U	0
4c	Pearson r	shNT	shRNA
	r	0.7612	0.7597
	95% confidence interval	0.1220 to 0.9541	0.1183 to 0.9538
	R squared	0.5794	0.5771
	P value
	P (two-tailed)	0.0282	0.0288
	P value summary	*	*
	Significant? (alpha = 0.05)	Yes	Yes
	Number of XY Pairs	8	8

## Sheet: Figure 5
5c	Unpaired t test with Welch's correction
	P value	0.0499
	P value summary	ns
	Significantly different (P < 0.05)?	No
	One- or two-tailed P value?	Two-tailed
	Welch-corrected t, df	t=2.307, df=7.119
5d	Unpaired t test with Welch's correction
	P value	0.6328
	P value summary	ns
	Significantly different (P < 0.05)?	No
	One- or two-tailed P value?	Two-tailed
	Welch-corrected t, df	t=0.4995, df=6.972
5e	Unpaired t test with Welch's correction
	P value	0.4661
	P value summary	ns
	Significantly different (P < 0.05)?	No
	One- or two-tailed P value?	Two-tailed
	Welch-corrected t, df	t=0.7977, df=4.380
5f	Paired t test
shNT	P value	0.0194
left panel	P value summary	*
	Significantly different (P < 0.05)?	Yes
	One- or two-tailed P value?	Two-tailed
	t, df	t=3.782, df=4
	Number of pairs	5
shRNA	Paired t test
right panel	P value	0.881
	P value summary	ns
	Significantly different (P < 0.05)?	No
	One- or two-tailed P value?	Two-tailed
	t, df	t=0.1595, df=4
	Number of pairs	5
5g	Paired t test
shNT	P value	0.0307
left panel	P value summary	*
	Significantly different (P < 0.05)?	Yes
	One- or two-tailed P value?	Two-tailed
	t, df	t=3.273, df=4
	Number of pairs	5
shRNA	Paired t test
right panel	P value	0.6213
	P value summary	ns
	Significantly different (P < 0.05)?	No
	One- or two-tailed P value?	Two-tailed
	t, df	t=0.5345, df=4
	Number of pairs	5
5h	Paired t test
shNT	P value	0.1087
left panel	P value summary	ns
	Significantly different (P < 0.05)?	No
	One- or two-tailed P value?	Two-tailed
	t, df	t=2.058, df=4
	Number of pairs	5
shRNA	Paired t test
right panel	P value	0.6213
	P value summary	ns
	Significantly different (P < 0.05)?	No
	One- or two-tailed P value?	Two-tailed
	t, df	t=0.5345, df=4
	Number of pairs	5

## Sheet: Figure 2 - supplement 1
suppl Figure 1 a	Unpaired t test with Welch's correction
FSR	ACC
	P value	0.0432
	P value summary	*
	Significantly different (P < 0.05)?	Yes
	One- or two-tailed P value?	Two-tailed
	Welch-corrected t, df	t=2.449, df=7.211
	CA1
	P value	0.7434
	P value summary	ns
	Significantly different (P < 0.05)?	No
	One- or two-tailed P value?	Two-tailed
	Welch-corrected t, df	t=0.3395, df=7.617
suppl Figure 1 b	Unpaired t test with Welch's correction
upper left	ACC FSR with FSR
	P value	0.98
	P value summary	ns
	Significantly different (P < 0.05)?	No
	One- or two-tailed P value?	Two-tailed
	Welch-corrected t, df	t=0.02616, df=5.893
upper right	ACC FSR with nFSR				One sample t-test against 0
	P value	0.4314				shNT	shRNA
	P value summary	ns			t, df	t=1.596, df=4	t=1.518, df=4
	Significantly different (P < 0.05)?	No			P value (two tailed)	0.1857	0.2037
	One- or two-tailed P value?	Two-tailed			P value summary	ns	ns
	Welch-corrected t, df	t=0.8535, df=5.125			Significant (alpha=0.05)?	No	No
lower left	CA1 FSR with FSR
	P value	0.044
	P value summary	*
	Significantly different (P < 0.05)?	Yes
	One- or two-tailed P value?	Two-tailed
	Welch-corrected t, df	t=2.396, df=7.866
lower right	CA1 FSR with nFSR				One sample t-test against 0
	P value	0.8764				shNT	shRNA
	P value summary	ns			t, df	t=0.9808, df=4	t=0.4178, df=4
	Significantly different (P < 0.05)?	No			P value (two tailed)	0.3822	0.6975
	One- or two-tailed P value?	Two-tailed			P value summary	ns	ns
	Welch-corrected t, df	t=0.1616, df=6.678			Significant (alpha=0.05)?	No	No
suppl Figure 1 c
	Unpaired t test with Welch's correction
upper left	P value	0.7017
ACC	P value summary	ns
	Significantly different (P < 0.05)?	No
	One- or two-tailed P value?	Two-tailed
	Welch-corrected t, df	t=0.3973, df=7.906
lower left	Unpaired t test with Welch's correction
CA1	P value	0.0859
	P value summary	ns
	Significantly different (P < 0.05)?	No
	One- or two-tailed P value?	Two-tailed
	Welch-corrected t, df	t=1.961, df=7.912
	Paired t test
middle upper panel	P value	0.4727
shNT	P value summary	ns
	Significantly different (P < 0.05)?	No
	One- or two-tailed P value?	Two-tailed
	t, df	t=0.7920, df=4
	Number of pairs	5
right upper panel	Paired t test
shRNA	P value	0.0214
	P value summary	*
	Significantly different (P < 0.05)?	Yes
	One- or two-tailed P value?	Two-tailed
	t, df	t=3.667, df=4
	Number of pairs	5
suppl Figure 1 d
	Paired t test
upper left	P value	0.0881
ACC shNT	P value summary	ns
	Significantly different (P < 0.05)?	No
	One- or two-tailed P value?	Two-tailed
	t, df	t=2.245, df=4
	Number of pairs	5
upper right	Paired t test
ACC shRNA	P value	0.0745
	P value summary	ns
	Significantly different (P < 0.05)?	No
	One- or two-tailed P value?	Two-tailed
	t, df	t=2.399, df=4
	Number of pairs	5
lower left	Paired t test
CA1 shNT	P value	0.1183
	P value summary	ns
	Significantly different (P < 0.05)?	No
	One- or two-tailed P value?	Two-tailed
	t, df	t=1.984, df=4
	Number of pairs	5
lower right	Paired t test
CA1 shRNA	P value	0.1216
	P value summary	ns
	Significantly different (P < 0.05)?	No
	One- or two-tailed P value?	Two-tailed
	t, df	t=1.959, df=4
	Number of pairs	5
suppl Figure 1 e
upper left	Paired t test
ACC shNT	P value	0.0632
	P value summary	ns
	Significantly different (P < 0.05)?	No
	One- or two-tailed P value?	Two-tailed
	t, df	t=2.551, df=4
	Number of pairs	5
upper right	Paired t test
ACC shRNA	P value	0.3796
	P value summary	ns
	Significantly different (P < 0.05)?	No
	One- or two-tailed P value?	Two-tailed
	t, df	t=0.9869, df=4
	Number of pairs	5
lower left	Paired t test
CA1 shNT	P value	0.0884
	P value summary	ns
	Significantly different (P < 0.05)?	No
	One- or two-tailed P value?	Two-tailed
	t, df	t=2.242, df=4
	Number of pairs	5
lower right	Paired t test
CA1 shRNA	P value	0.0855
	P value summary	ns
	Significantly different (P < 0.05)?	No
	One- or two-tailed P value?	Two-tailed
	t, df	t=2.273, df=4
	Number of pairs	5

## Sheet: Figure 3 - supplement 1
Figure 3 -supplement 1	Two Way ANOVA with repeated measures
left panel	ACC moving ratio
	Source of Variation	% of total variation	P value	P value summary	Significant?	Geisser-Greenhouse's epsilon	F (DFn, DFd)
	time x virus	4.388	0.5543	ns	No		F (5, 40) = 0.8030
	time	16.04	0.075	ns	No	0.4422	F (2.211, 17.69) = 2.936
	virus	1.497	0.5712	ns	No		F (1, 8) = 0.3485
	Subject	34.36	0.0017	**	Yes		F (8, 40) = 3.930
right panel	CA1 moving ratio
	Source of Variation	% of total variation	P value	P value summary	Significant?	Geisser-Greenhouse's epsilon	F (DFn, DFd)
	time x virus	1.42	0.9577	ns	No		F (5, 40) = 0.2069
	time	15.28	0.142	ns	No	0.3902	F (1.951, 15.61) = 2.225
	virus	0.1237	0.8562	ns	No		F (1, 8) = 0.03501
	Subject	28.25	0.0229	*	Yes		F (8, 40) = 2.572
suppl 1 d	Pearson r	CA1 A	CA1 C	ACC A	ACC C
correlated pairs vs moving	r	-0.2964	0.1896	0.4467	0.02991
	95% confidence interval	-0.7610 to 0.3691	-0.4996 to 0.7319	-0.2545 to 0.8400	-0.6112 to 0.6473
	R squared	0.08787	0.03596	0.1995	0.0008948
suppl 1 f	Unpaired t test with Welch's correction			Unpaired t test with Welch's correction
A&C neurons among Ccpairs in CA1 day 1	ACC			CA1
	P value	0.7155		P value	0.715
	P value summary	ns		P value summary	ns
	Significantly different (P < 0.05)?	No		Significantly different (P < 0.05)?	No
	One- or two-tailed P value?	Two-tailed		One- or two-tailed P value?	Two-tailed
	Welch-corrected t, df	t=0.3792, df=7.207		Welch-corrected t, df	t=0.3820, df=6.319
suppl 1 h	Unpaired t test with Welch's correction			Unpaired t test with Welch's correction
A&C neurons among Ccpairs in CA1 day 16	ACC			CA1
	P value	0.875		P value	0.0174
	P value summary	ns		P value summary	*
	Significantly different (P < 0.05)?	No		Significantly different (P < 0.05)?	Yes
	One- or two-tailed P value?	Two-tailed		One- or two-tailed P value?	Two-tailed
	Welch-corrected t, df	t=0.1624, df=7.994		Welch-corrected t, df	t=3.031, df=7.544
suppl 1 j	Two Way ANOVA with repeated measures
upper left	ACC shNT
	Source of Variation	% of total variation	P value	P value summary	Significant?	Geisser-Greenhouse's epsilon	F (DFn, DFd)
	Time x context	28.23	<0.0001	****	Yes		F (71, 568) = 7.193
	Time	26.29	0.0013	**	Yes	0.04639	F (3.294, 26.35) = 6.699
	context	2.585	0.2165	ns	No		F (1, 8) = 1.800
	Subject	11.49	<0.0001	****	Yes		F (8, 568) = 25.98
upper right	ACC shRNA
	Source of Variation	% of total variation	P value	P value summary	Significant?	Geisser-Greenhouse's epsilon	F (DFn, DFd)
	Time x context	16.77	<0.0001	****	Yes		F (71, 568) = 2.307
	Time	12.8	0.1563	ns	No	0.05995	F (4.256, 34.05) = 1.761
	context	0.004671	0.9574	ns	No		F (1, 8) = 0.003041
	Subject	12.29	<0.0001	****	Yes		F (8, 568) = 15.01
lower left	CA1 shNT
	Source of Variation	% of total variation	P value	P value summary	Significant?	Geisser-Greenhouse's epsilon	F (DFn, DFd)
	Time x context	12.24	<0.0001	****	Yes		F (71, 568) = 2.121
	Time	27.15	0.007	**	Yes	0.04823	F (3.424, 27.39) = 4.707
	context	6.843	0.0279	*	Yes		F (1, 8) = 7.185
	Subject	7.619	<0.0001	****	Yes		F (8, 568) = 11.72
lower right	CA1 shRNA
	Source of Variation	% of total variation	P value	P value summary	Significant?	Geisser-Greenhouse's epsilon	F (DFn, DFd)
	Time x context	16.84	<0.0001	****	Yes		F (71, 568) = 3.421
	Time	21.02	0.0123	*	Yes	0.04584	F (3.255, 26.04) = 4.270
	context	10.68	0.0288	*	Yes		F (1, 8) = 7.076
	Subject	12.07	<0.0001	****	Yes		F (8, 568) = 21.76
suppl 1 l	Two Way ANOVA with repeated measures
upper left	ACC shNT
	Source of Variation	% of total variation	P value	P value summary	Significant?	Geisser-Greenhouse's epsilon	F (DFn, DFd)
	Time x context	8.712	0.4558	ns	No		F (71, 568) = 1.012
	Time	10.35	0.3213	ns	No	0.08653	F (6.144, 49.15) = 1.201
	context	0.0662	0.8387	ns	No		F (1, 8) = 0.04422
	Subject	11.98	<0.0001	****	Yes		F (8, 568) = 12.34
upper left	ACC shRNA
	Source of Variation	% of total variation	P value	P value summary	Significant?	Geisser-Greenhouse's epsilon	F (DFn, DFd)
	Time x context	7.685	0.8633	ns	No		F (71, 568) = 0.8114
	Time	9.341	0.4456	ns	No	0.08567	F (6.083, 48.66) = 0.9862
	context	0.1134	0.7297	ns	No		F (1, 8) = 0.1280
	Subject	7.088	<0.0001	****	Yes		F (8, 568) = 6.641
lower left	CA1 shNT
	Source of Variation	% of total variation	P value	P value summary	Significant?	Geisser-Greenhouse's epsilon	F (DFn, DFd)
	Time x context	14.97	<0.0001	****	Yes		F (71, 568) = 5.300
	Time	18.18	0.0004	***	Yes	0.06157	F (4.371, 34.97) = 6.435
	context	0.02064	0.9528	ns	No		F (1, 8) = 0.003734
	Subject	44.23	<0.0001	****	Yes		F (8, 568) = 139.0
lower right	CA1 shRNA
	Source of Variation	% of total variation	P value	P value summary	Significant?	Geisser-Greenhouse's epsilon	F (DFn, DFd)
	Time x context	21.64	<0.0001	****	Yes		F (71, 568) = 4.018
	Time	26.88	0.005	**	Yes	0.04884	F (3.468, 27.74) = 4.990
	context	0.2974	0.6026	ns	No		F (1, 8) = 0.2937
	Subject	8.101	<0.0001	****	Yes		F (8, 568) = 13.35

## Sheet: Figure 3 - supplement 2
Figure 3 - supplement 2
suppl 2 b
jaccard idx vs certainty	Pearson r	shNT CA1	shRNA CA1	shNT ACC	shRNA ACC
	r	0.2313	0.1706	0.2939	0.1893
	95% confidence interval	-0.4663 to 0.7515	-0.5143 to 0.7226	-0.4120 to 0.7793	-0.4999 to 0.7317
	R squared	0.05348	0.02909	0.08637	0.03583
	P value
	P (two-tailed)	0.5203	0.6376	0.4098	0.6004
	P value summary	ns	ns	ns	ns
	Significant? (alpha = 0.05)	No	No	No	No
	Number of XY Pairs	10	10	10	10
suppl 2 c	Unpaired t test with Welch's correction
upper left	ACC day 1
	P value	0.3497
	P value summary	ns
	Significantly different (P < 0.05)?	No
	One- or two-tailed P value?	Two-tailed
	Welch-corrected t, df	t=1.020, df=5.607
upper right	ACC day 16
	P value	0.044
	P value summary	*
	Significantly different (P < 0.05)?	Yes
	One- or two-tailed P value?	Two-tailed
	Welch-corrected t, df	t=2.469, df=6.772
lower left	CA1 day 1
	P value	0.05
	P value summary	*
	Significantly different (P < 0.05)?	Yes
	One- or two-tailed P value?	Two-tailed
	Welch-corrected t, df	t=2.408, df=6.423
lower right	CA1 day 16
	P value	0.5672
	P value summary	ns
	Significantly different (P < 0.05)?	No
	One- or two-tailed P value?	Two-tailed
	Welch-corrected t, df	t=0.6019, df=6.645

## Sheet: Figure 3 - supplement 3
Figure 3 - supplement 3
suppl 3 a
freezing during training	2-Way ANOVA with repeated measures
ACC shNT vs CA1 shNT	Source of Variation	% of total variation	P value	P value summary	Significant?	Geisser-Greenhouse's epsilon			F (DFn, DFd)
	time x brain region	0.2742	0.995	ns	No				F (5, 40) = 0.07976
	time	55.24	0.0015	**	Yes	0.2592			F (1.296, 10.37) = 16.07
	brain region	4.919	0.1085	ns	No				F (1, 8) = 3.262
	Subject	12.06	0.0487	*	Yes				F (8, 40) = 2.193
suppl 3 b
moving index during recall day 1	2-Way ANOVA with repeated measures
ACC shNT vs CA1 shNT	Source of Variation	% of total variation	P value	P value summary	Significant?	Geisser-Greenhouse's epsilon			F (DFn, DFd)
	time x brain region	3.599	0.6474	ns	No				F (5, 40) = 0.6714
	time	24	0.0189	*	Yes	0.4977			F (5, 40) = 4.478
	brain region	0.1082	0.868	ns	No				F (1, 8) = 0.02944
	Subject	29.4	0.0043	**	Yes				F (8, 40) = 3.428
suppl 3 c
discrimination ratio recall day 1	2-Way ANOVA with repeated measures
ACC shNT vs CA1 shNT	Source of Variation	% of total variation	P value	P value summary	Significant?	Geisser-Greenhouse's epsilon			F (DFn, DFd)
	time x brain region	1.103	0.9775	ns	No				F (5, 40) = 0.1544
	time	15.47	0.1293	ns	No	0.5191			F (2.595, 20.76) = 2.166
	brain region	1.977	0.4432	ns	No				F (1, 8) = 0.6506
	Subject	24.31	0.0556	ns	No				F (8, 40) = 2.127
suppl 3 d
discrimination ratio recall day 16	2-Way ANOVA with repeated measures
ACC shNT vs CA1 shNT	Source of Variation	% of total variation	P value	P value summary	Significant?	Geisser-Greenhouse's epsilon
	time x brain region	3.39	0.8488	ns	No				F (DFn, DFd)
	time	4.031	0.6795	ns	No	0.5187			F (5, 40) = 0.3958
	brain region	0.004746	0.9693	ns	No				F (2.594, 20.75) = 0.4706
	Subject	24.04	0.1156	ns	No				F (1, 8) = 0.001579

## Sheet: Figure 5 - supplement 1
Figure 5 - supplement 1
suppl 1 a	Two-way RM ANOVA
	Source of Variation	% of total variation	P value	P value summary	Significant?	F (DFn, DFd)
	time x virus	2.305	0.5052	ns	No	F (1, 8) = 0.4867
	time	0.0544	0.9173	ns	No	F (1, 8) = 0.01148
	virus	0.0209	0.9591	ns	No	F (1, 8) = 0.002800
	Subject	59.72	0.2673	ns	No	F (8, 8) = 1.576
suppl 1 b	Two-way RM ANOVA
	Source of Variation	% of total variation	P value	P value summary	Significant?	F (DFn, DFd)
	time x virus	2.192	0.247	ns	No	F (1, 8) = 1.560
	time	6.161	0.0696	ns	No	F (1, 8) = 4.384
	virus	3.064	0.5889	ns	No	F (1, 8) = 0.3170
	Subject	77.34	0.0066	**	Yes	F (8, 8) = 6.879
suppl 1 c	Two-way RM ANOVA
	Source of Variation	% of total variation	P value	P value summary	Significant?	F (DFn, DFd)
	time x virus	0.2358	0.7739	ns	No	F (1, 8) = 0.08830
	time	1.049	0.5482	ns	No	F (1, 8) = 0.3930
	virus	9	0.3348	ns	No	F (1, 8) = 1.053
	Subject	68.35	0.0601	ns	No	F (8, 8) = 3.200
